# Supplementary material for: Significant influence of oxygenated volatile organic compounds on atmospheric chemistry analysis: A case study in a typical industrial city in China
Source: Copernicus journal article supplement (doi:10.5194/egusphere-2024-3201), 2024-11-25
Supplement: Supplementary file 1 [file egusphere-2024-3201-supplement.pdf]

1 *Supplementary of*

2 **Significant influence of oxygenated volatile organic compounds on**  
3 **atmospheric chemistry analysis: A case study in a typical industrial**  
4 **city in China**

5 **Jingwen Dai et al.**

6 *Correspondence:* Li Li (Lily@shu.edu.cn) and Kun Zhang (zk1231@shu.edu.cn)

## 7 **Text S1 Adjustments of model parameter**

8 The base parameter settings of the OBM were shown in Sec 2.2. As formal studies have reported,  
9 PKU-Mo as a catalytic converter for NO<sub>2</sub> measurement can cause interferences from other nitrogen–  
10 oxygen compounds (e.g., PAN, HNO<sub>3</sub>), which can lead to an overestimation NO<sub>2</sub> by 30%~50%  
11 (Kim et al., 2015; Tan et al., 2017, 2019; Xu et al., 2013). In addition, strong anthropogenic  
12 emissions (such as vehicle emissions) around these sites, the model might not be able to reach the  
13 steady state resulting in positive deviation (Li et al., 2014). Therefore, the observed NO<sub>2</sub>  
14 concentrations among those 5 sites were reduced by 30%~40% to compensate for interferences from  
15 catalytic converter (Xu et al., 2013), and NO steady-state approximations (NO<sub>ss</sub>) was calculated  
16 (Del Negro et al., 1999), which were then used for OBM inputs. Simulation constrained by all  
17 observed parameters including OVOCs and adjusted NO<sub>2</sub> and NO serves as the Base scenario. In  
18 order to investigate the impacts of model with OVOCs observationally constrained, scenario Free  
19 (Table S3) was conducted on top of the Base scenario by excluding observation constraints of  
20 OVOCs so that they were mainly generated by the oxidation of precursor VOCs in OBM.

## 21 **Text S2 Model validation**

22 The time series plot of modeled and observed O<sub>3</sub> (Figure S6) and the model validation parameters  
23 were shown in (Table S4). The box model could be able to capture the diurnal variations of O<sub>3</sub>, but  
24 the scenario M0 generally overestimated the O<sub>3</sub> peaks, which may be related to the overestimation  
25 of NO<sub>2</sub>. After adjusting for the observed NO<sub>2</sub> concentrations by cutting by 30%~40% (40% for ZL,  
26 CQ and XD, 30% for CD and TZ) in scenario M1, the peak of O<sub>3</sub> in M1 was significantly decreased.  
27 It showed that the observed NO concentrations were significantly higher than the modeled NO in  
28 scenario M0 and M1. As discussed before, there was strong vehicle emissions nearby those sites  
29 especially during August 8-9, which may result in failing to reach steady stat. By further adjusting  
30 the input of NO to the approximate steady state concentration (NO<sub>ss</sub>) in scenario M2 for each site,  
31 the peak of O<sub>3</sub> was further reduced that counteracted the reduction of titration of O<sub>3</sub> by NO, and  
32 closer to the observations overall (Figure S6 (b)). The modeled O<sub>3</sub> remain underestimate or  
33 overestimate at some times during the daytime, and significantly underestimate at night (Figure  
34 S11). This discrepancy may be due to the limitations of the 0-D model to express the transport

35 processes in the atmosphere due to its simplification of atmospheric physical processes. The  
36 simplification of physical process is acceptable for modeling of in situ photochemistry.

### 37 **Text S3 Simulations of OVOCs in the Free scenario**

38 Similar to Base scenario but without OVOCs observationally constraints in the Free scenario, the  
39 hourly average concentration of OVOCs at five sites was  $24.7 \pm 7.2$  ppb, with a 59.1% overpredict  
40 of observations ( $15.5 \pm 11.3$  ppb). OVOCs at CD ( $18.7 \pm 4.1$  ppb), CQ ( $26.3 \pm 6.6$  ppb), XD ( $24.7 \pm 7.0$   
41 ppb), and ZL ( $32.1 \pm 6.2$  ppb) sites were overestimated in Free scenario by 81.4%, 88.4%, 42.1%,  
42 and 126.5%, respectively. The OVOCs concentrations in the atmosphere are subject to a  
43 combination of emission, secondary generation, and removal processes. Given that direct emissions  
44 of OVOCs are not considered in the Free scenario, the OVOCs concentrations in the model are  
45 determined by the generation and removal processes. In terms of the production process, it can be  
46 influenced by the emission of precursor VOCs indirectly. It has shown that in the presence of strong  
47 emission sources of VOCs, the model might not be able to reach an steady state, leading to a  
48 significant overestimation (Li et al., 2014). The observed OVOCs at TZ during August 8 were  
49 unusually high due to transient emissions (Figure S6 (c)), pulling up the average levels. However,  
50 during the later days, the modeled OVOCs ( $15.5 \pm 10.7$  ppb) were also higher (15.3%) than the  
51 observed concentrations ( $13.4 \pm 11.5$  ppb) consisting with the other sites.

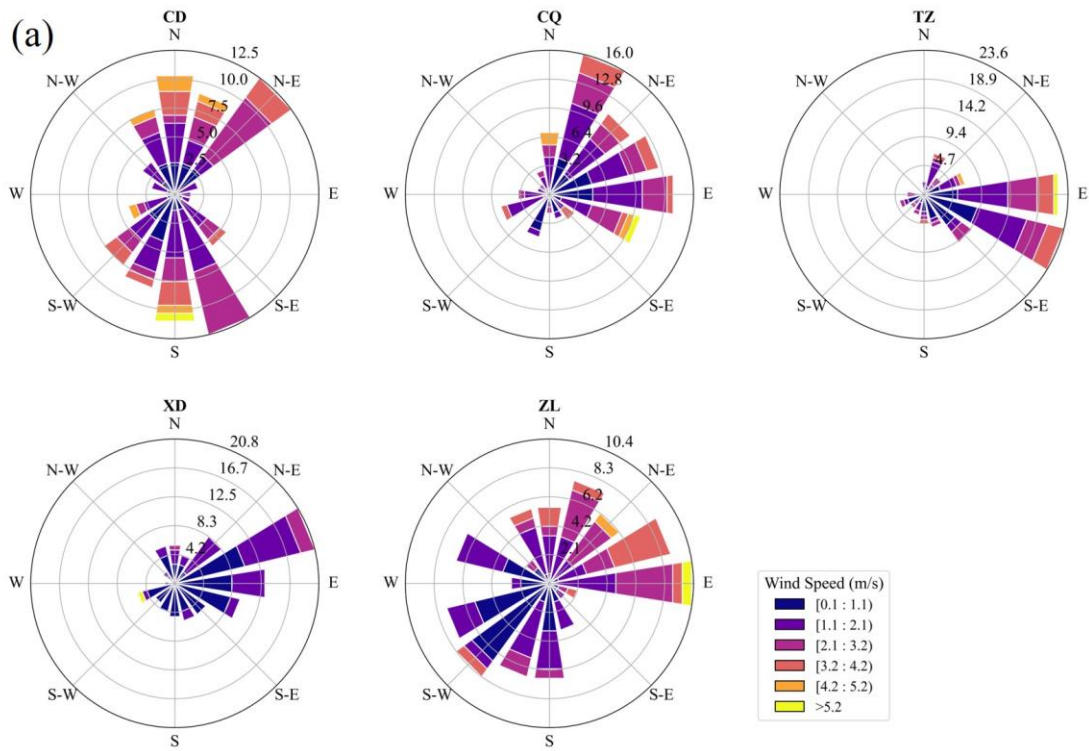

52

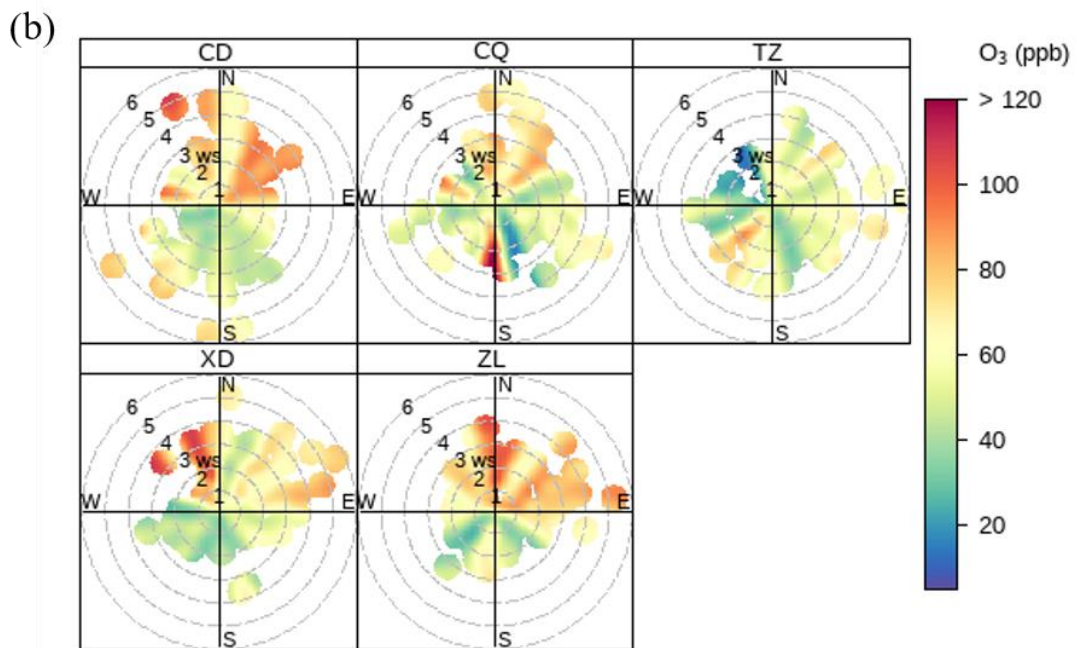

53

54

55

**Figure S1 (a) Wind rose and (b) O<sub>3</sub> pollution rose diagram of each site during the observation period.**

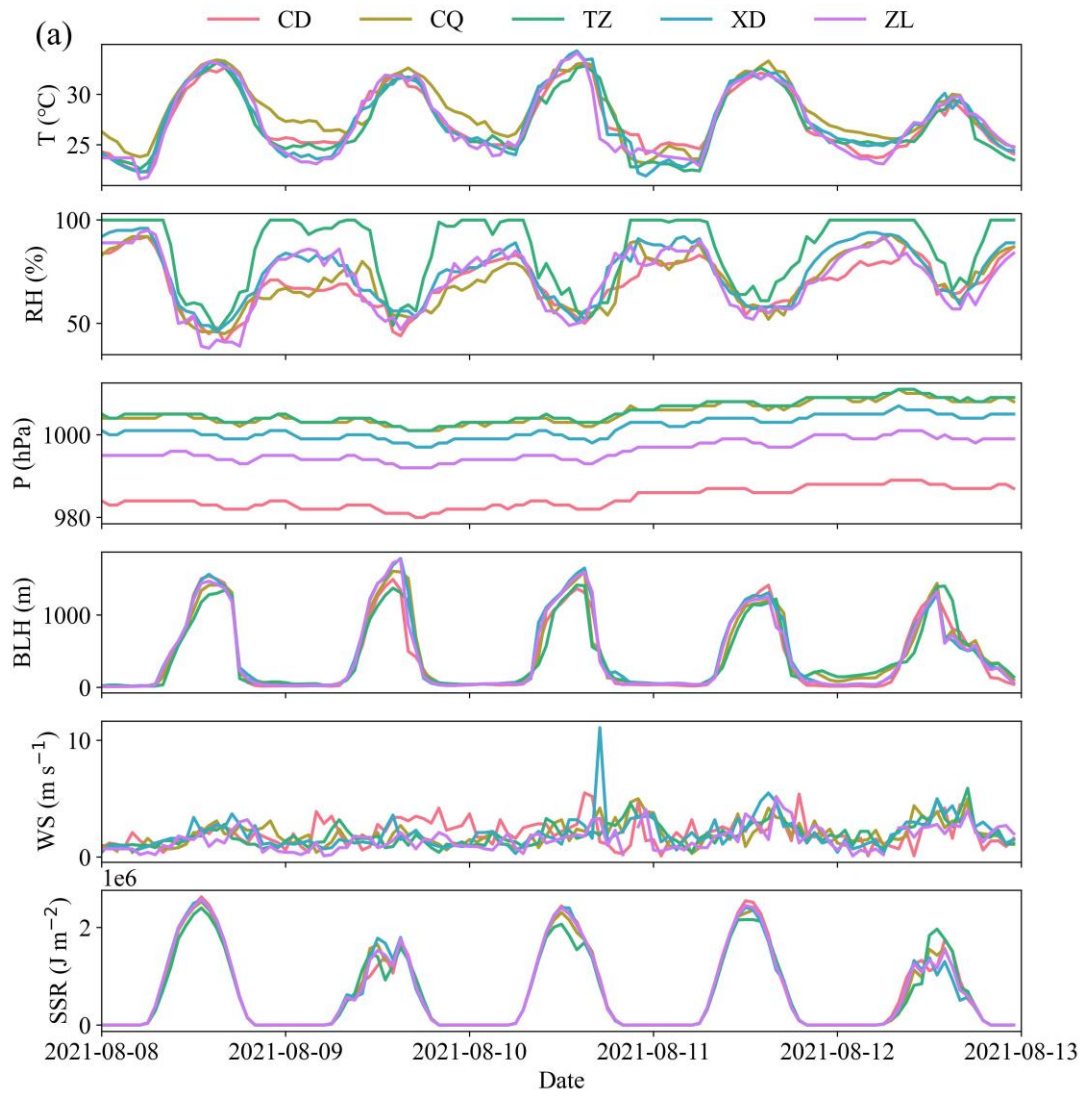

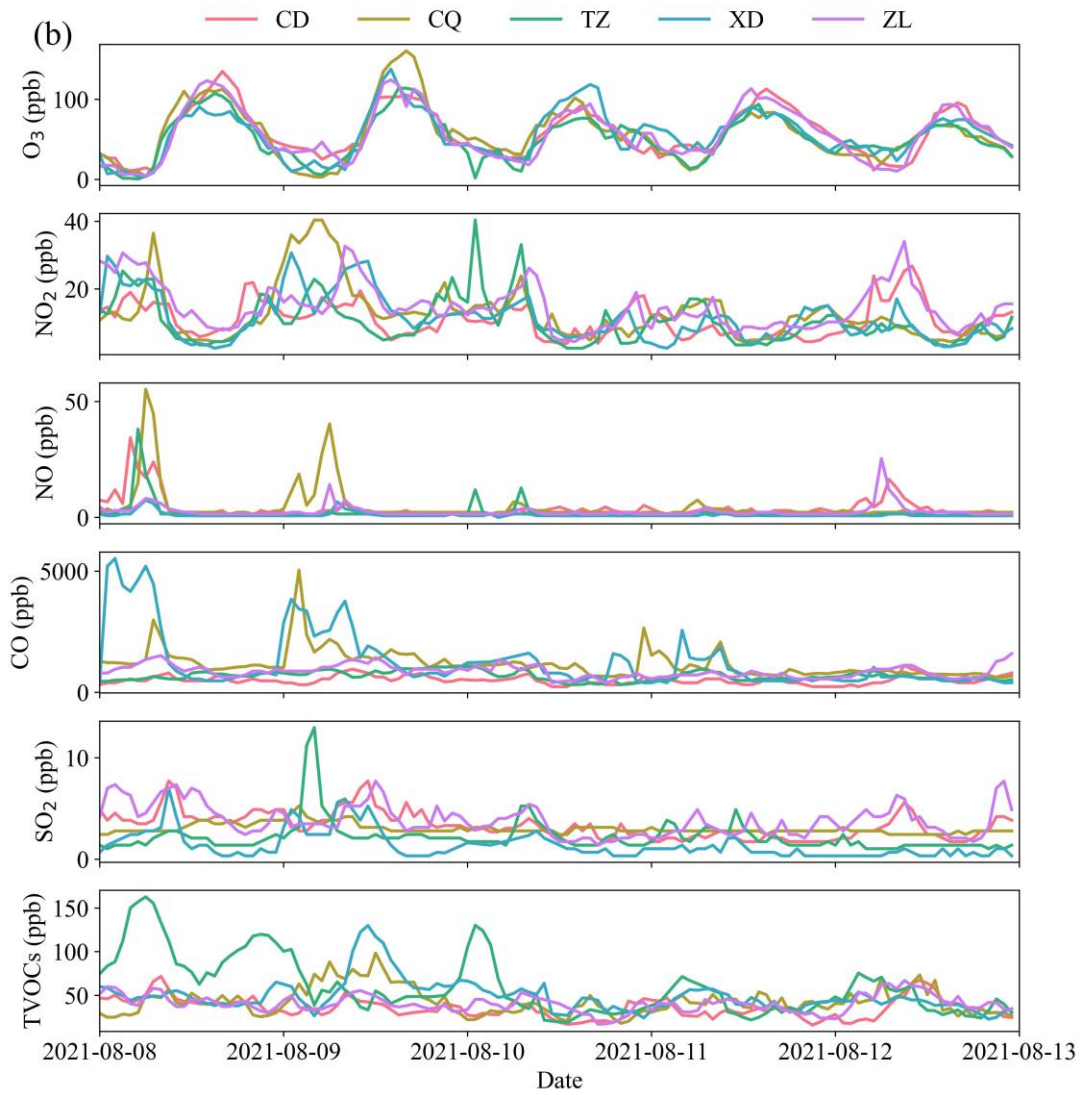

57

58 **Figure S2 Time series of (a) meteorological parameters and (b) major pollutant mixing**  
 59 **ratios at five sites in Zibo.**

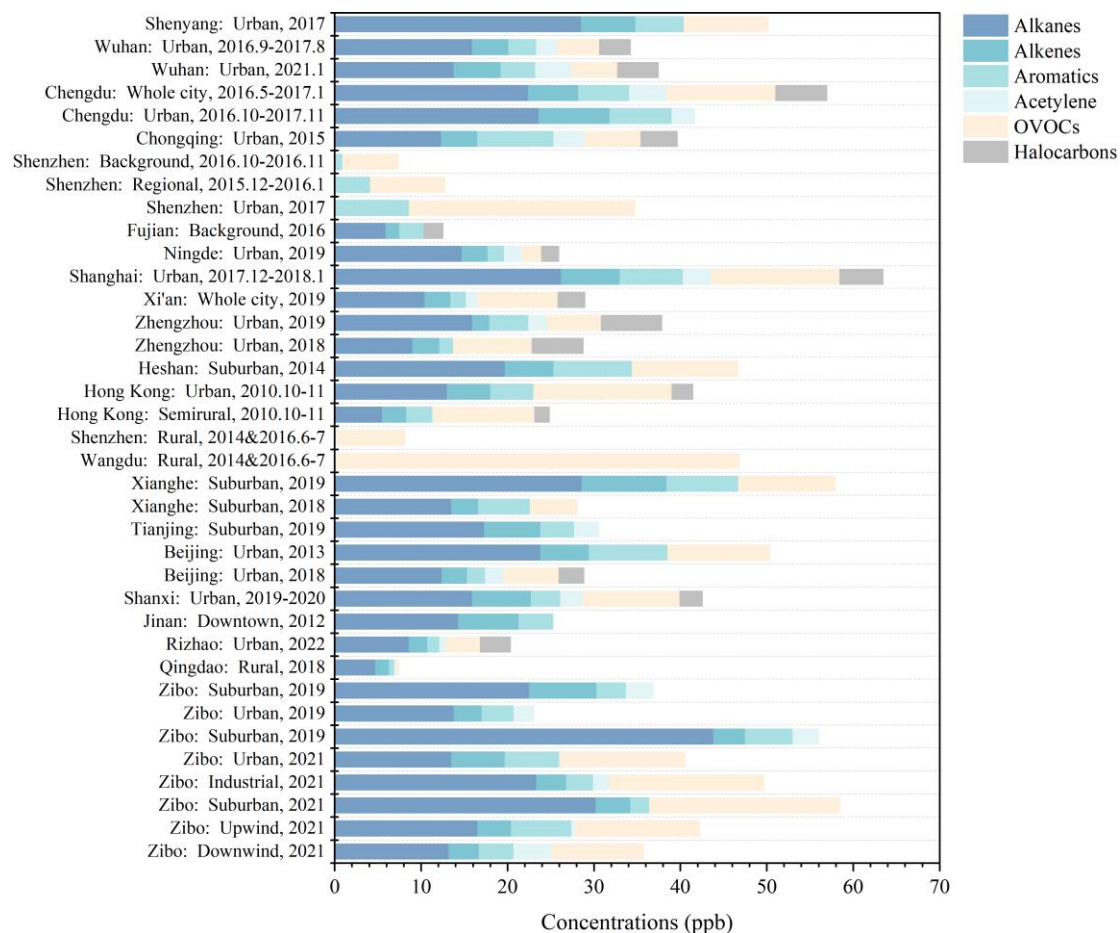

60

61 **Figure S3 Comparison of VOC concentrations and compositions in this study with former**  
 62 **studies based on Table S4.**

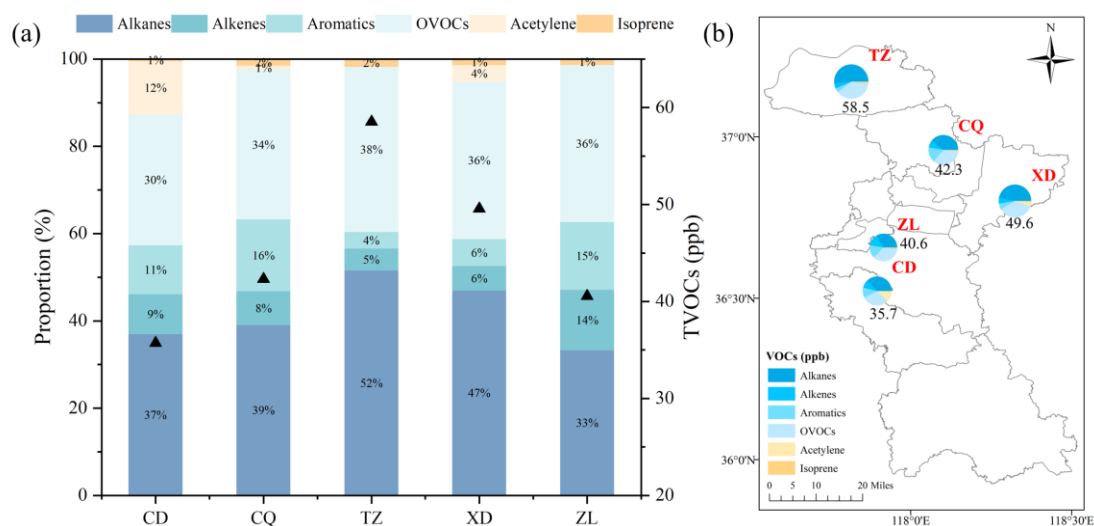

63

64 **Figure S4 (a) Comparison and (b) spatial distribution of VOCs components among five sites.**

65

66



67

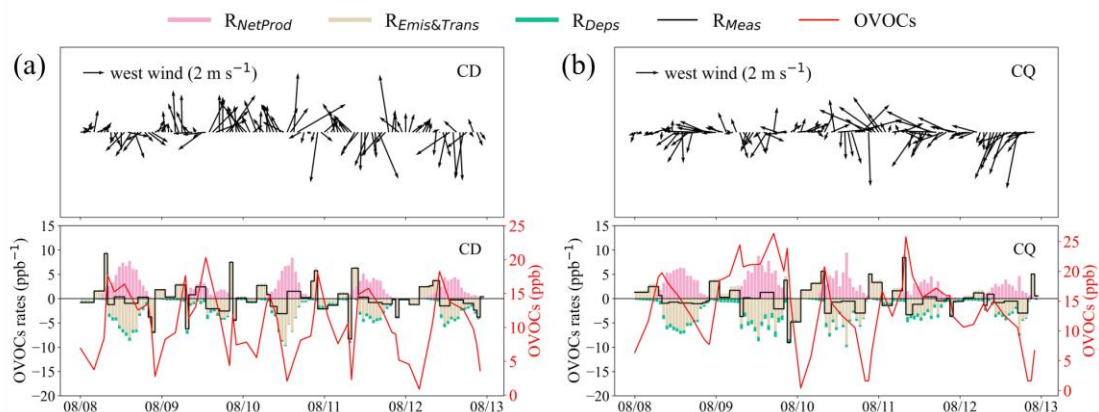

68

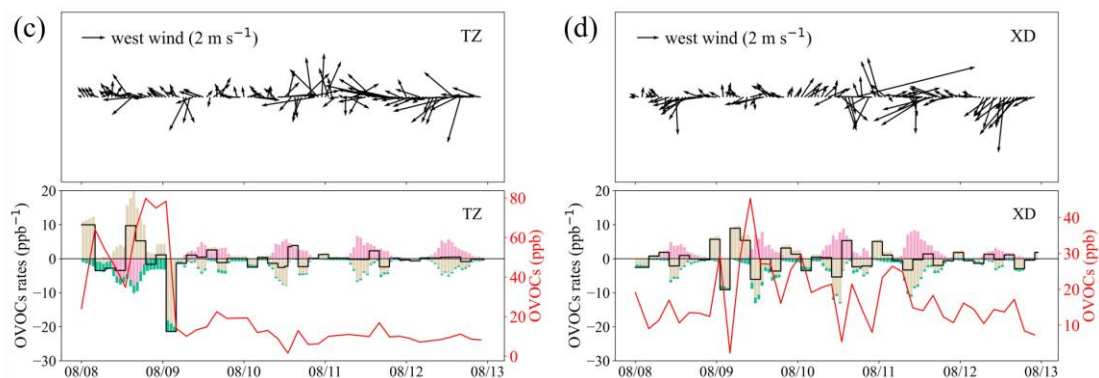

69

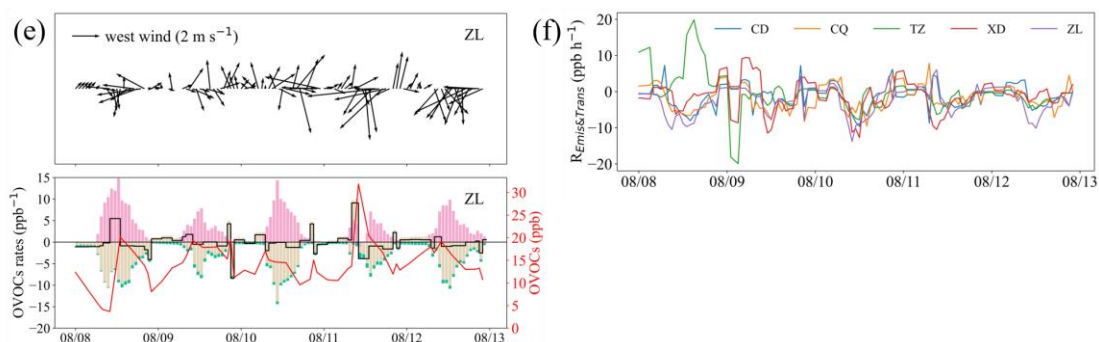

70 **Figure S5 OVOCs accumulation and contributions from local net photochemical production**  
71 **and emissions/transport, and winds at (a) CD, (b) CQ, (c) TZ, (d) XD, and (e) ZL sites,**  
72 **respectively, and (f) time variations of  $R_{Emis\&Trans}$  for all sites.  $R_{NetProd}$ ,  $R_{Emis\&Trans}$ ,  $R_{Dep}$  and**  
73  **$R_{Meas}$  in the legend represent local net O<sub>3</sub> photochemical production, emissions and regional**  
74 **transport, deposition and observed OVOCs formation rates, respectively.**



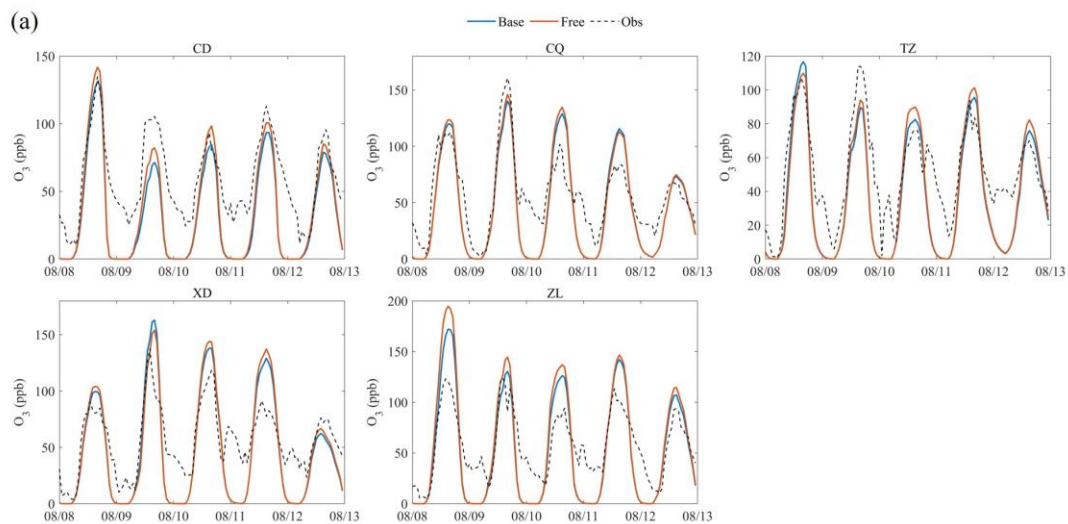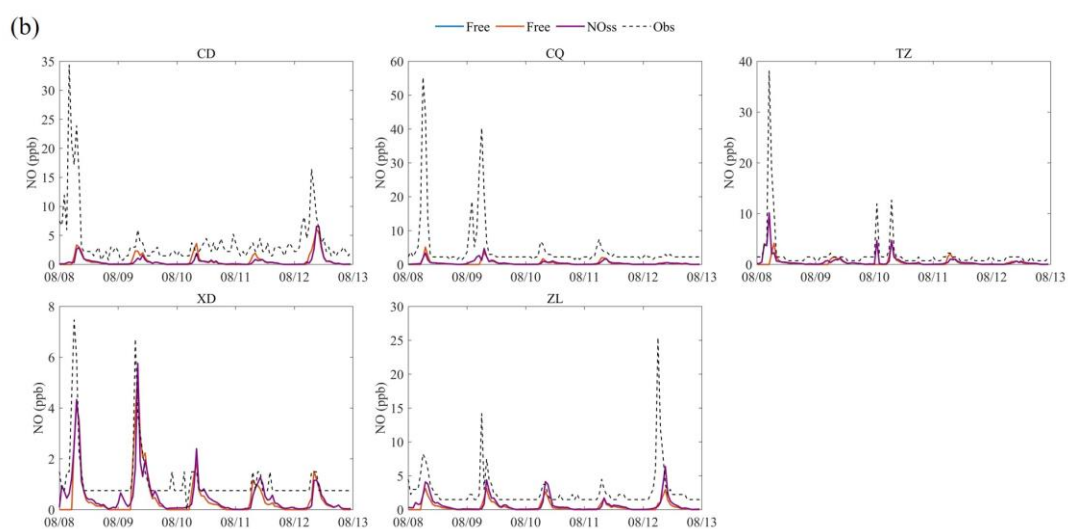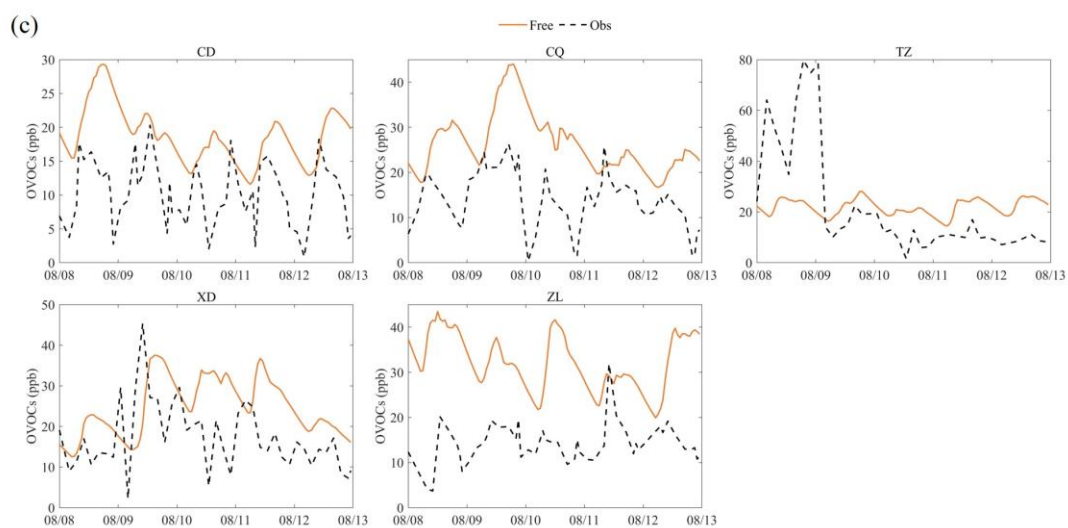

78 **Figure S6 Time series of O<sub>3</sub>, NO<sub>x</sub> from observations (Obs), simulations (Base and Free**  
 79 **scenarios) and NO steady state (NOss), and that of OVOCs only including input species from**  
 80 **observation and Free scenario.**

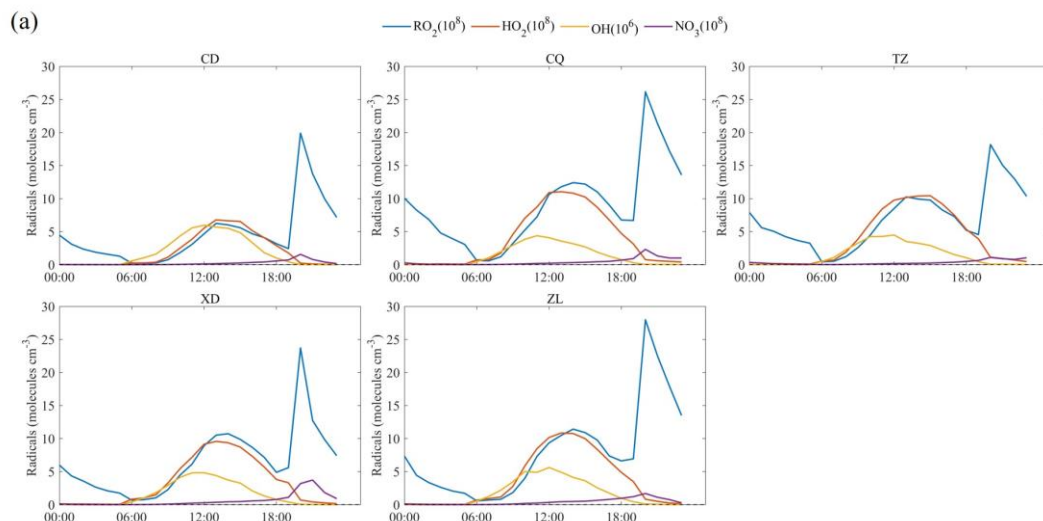

81

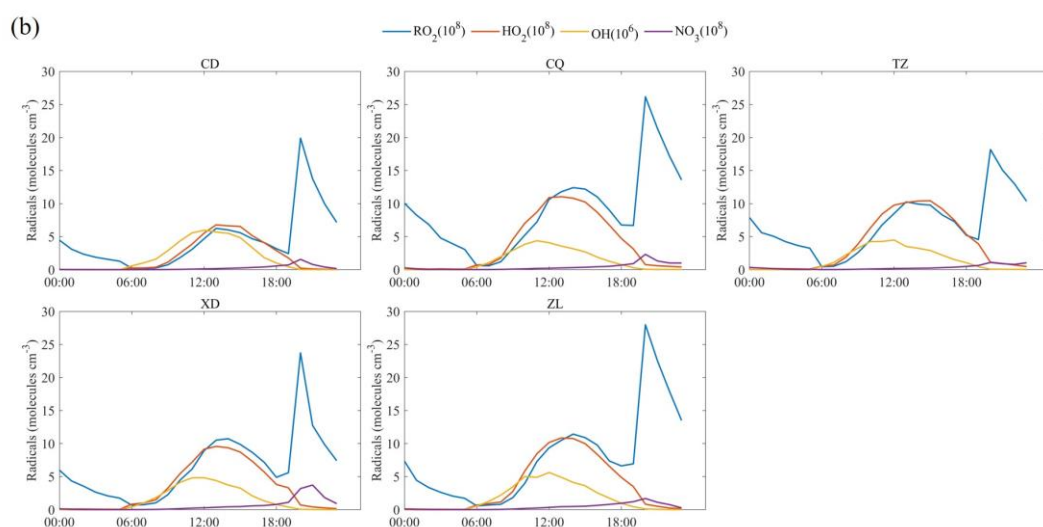

82

83 **Figure S7 (a) Simulated average daytime variation of ROx (RO<sub>2</sub>, HO<sub>2</sub>, and OH) and NO<sub>3</sub>**  
 84 **radicals at five sites, and (b) the effects of OVOCs observationally constrains on radical**  
 85 **concentrations, calculated by (Free – Base).**

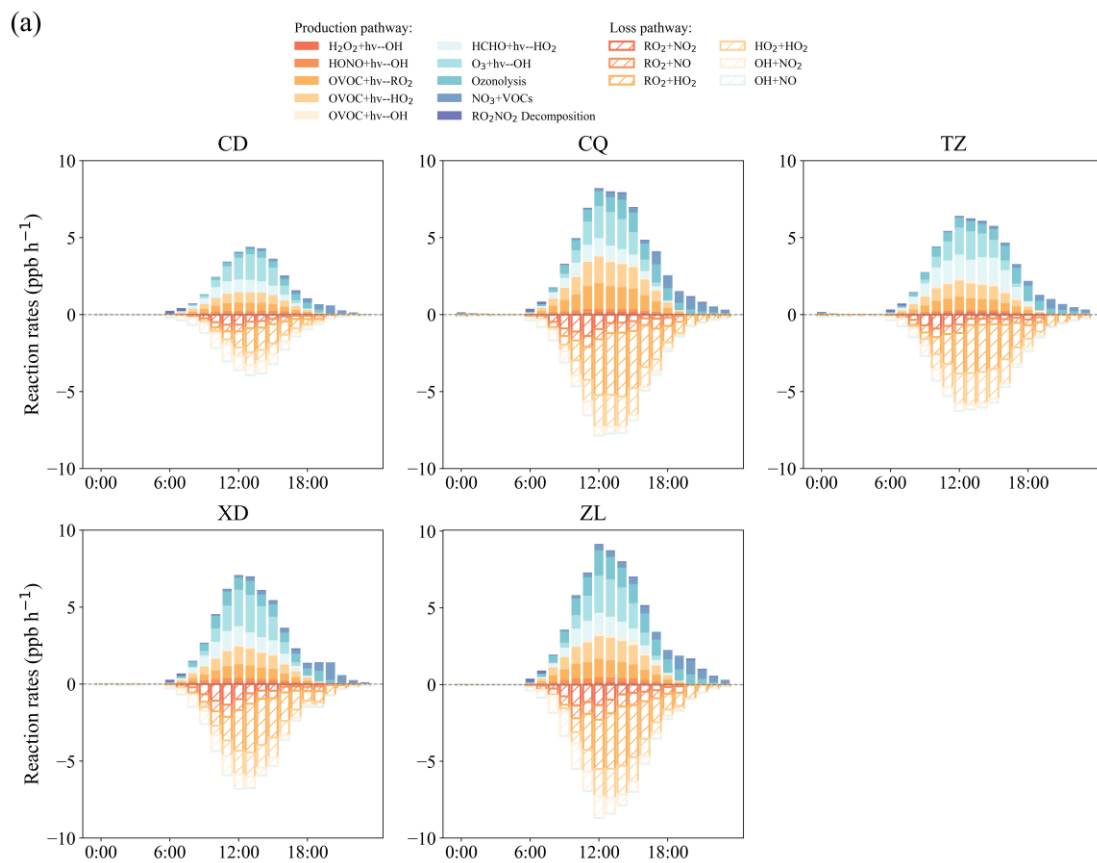

86

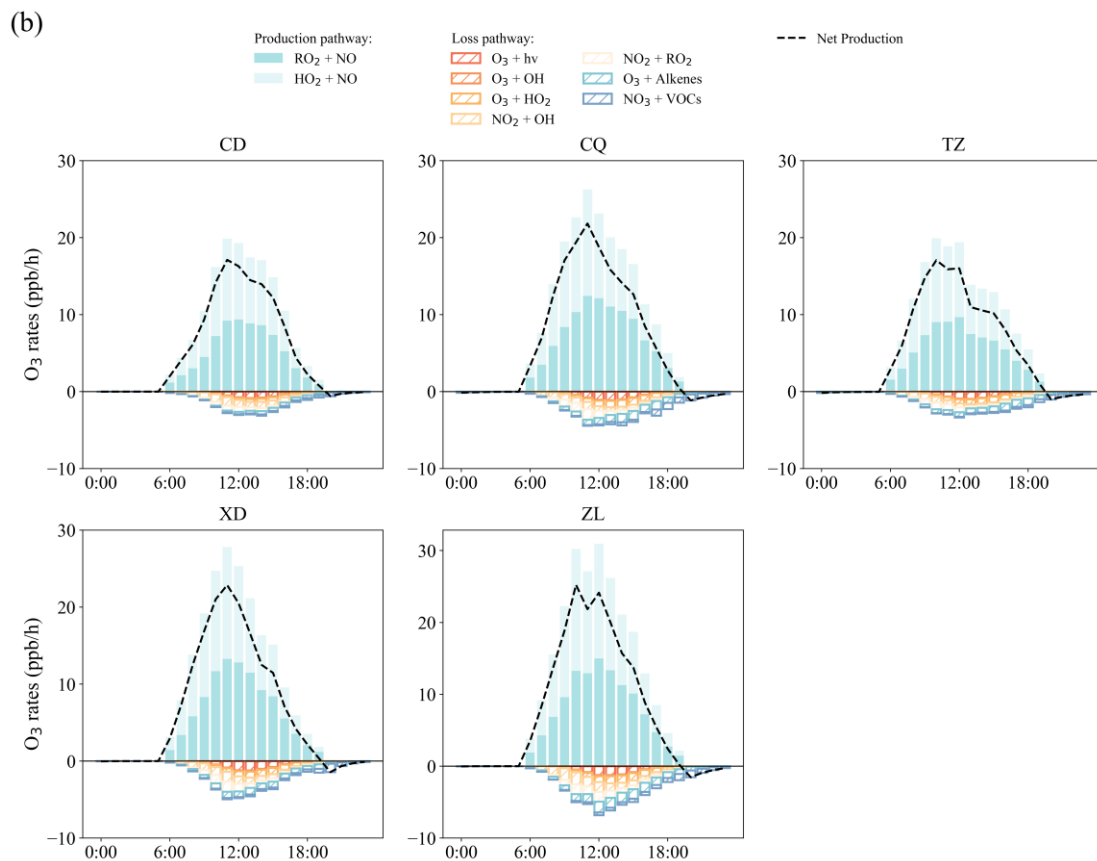

87

88 **Figure S8 Average diurnal profiles of sources and sinks of (a)  $\text{RO}_x$  and (b)  $\text{O}_3$  in the Base**  
 89 **scenario.**

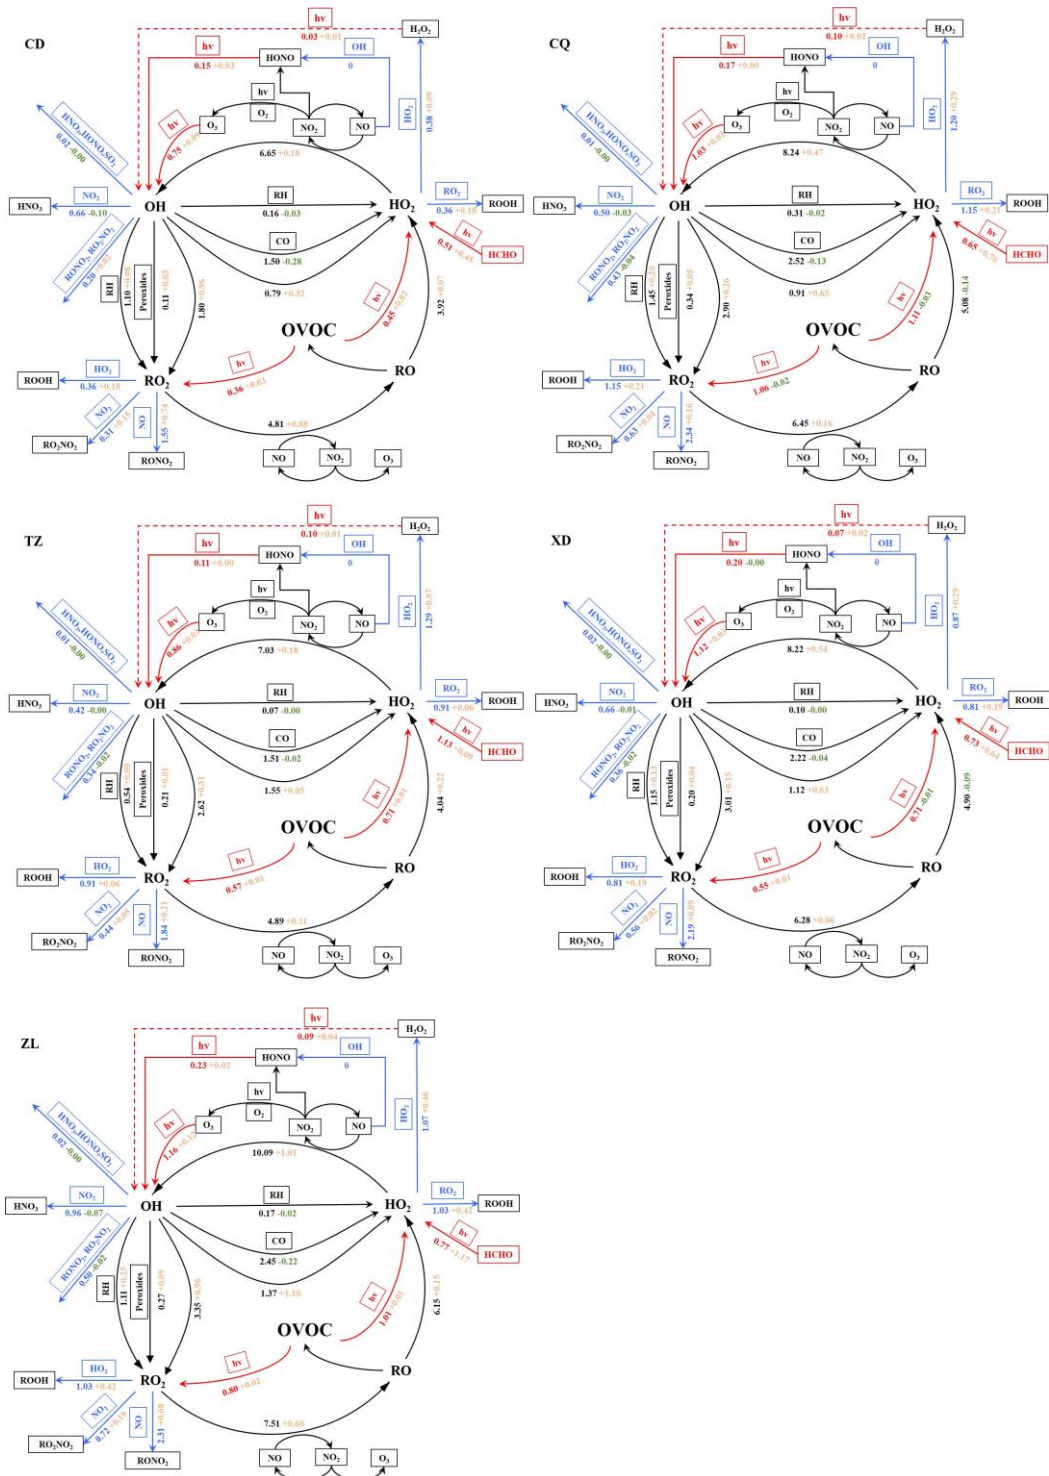

90

91 **Figure S9 Daytime (8:00-18:00 LT) average budgets of RO<sub>x</sub> radicals (in ppb h<sup>-1</sup>) at each site**  
 92 **in Base scenario and the difference between Free and Base scenario. The first values were**  
 93 **the rates of Base, followed by the difference between Free and Base, where ‘-’ means that the**  
 94 **rate of Free scenario is lower than that of Base (in green), and conversely ‘+’ means that the**  
 95 **rate of Free is higher than that of Base (in orange). Primary RO<sub>x</sub> sources and sinks are in**  
 96 **red and blue, respectively, and the black lines represent the processes in RO<sub>x</sub> and NO<sub>x</sub>**  
 97 **recycling.**

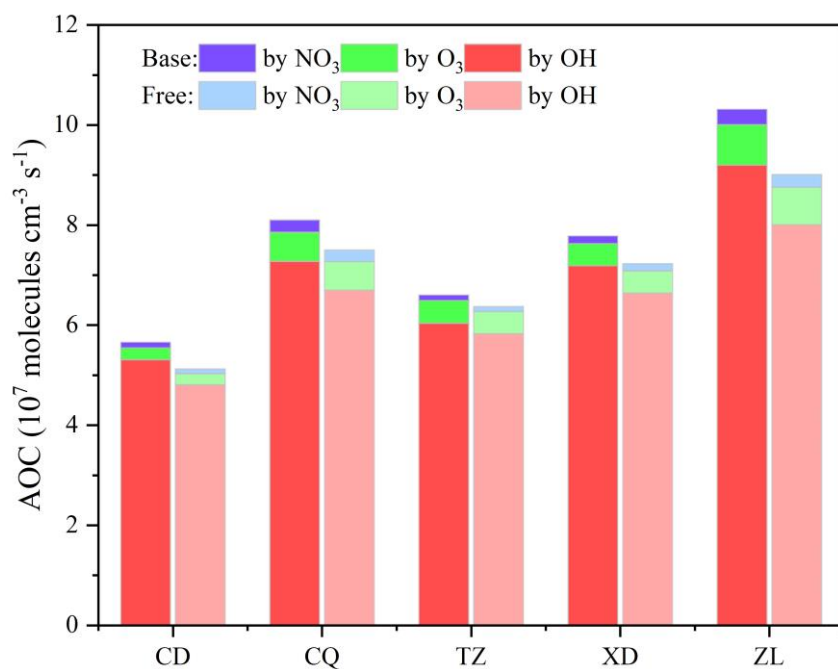

98

99 **Figure S10 Comparison of daytime atmospheric oxidation capacity (AOC) between Base and**  
 100 **Free scenario.**

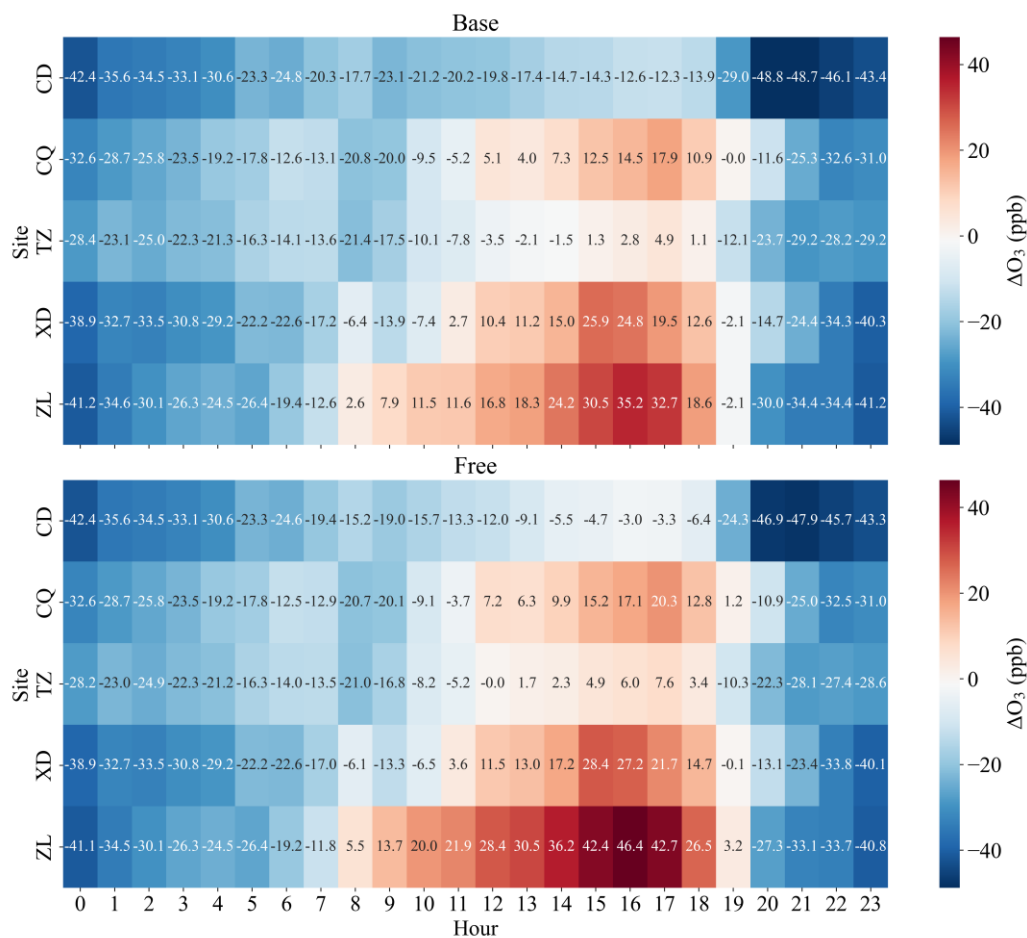

101

102 **Figure S11 Heat map of O<sub>3</sub> concentration difference ( $\Delta\text{O}_3 = \text{Sim} - \text{Obs}$ ) between simulated**  
 103 **and observed of Base and Free scenario**

**Table S1 Location and site classification for the five different sites of Zibo**

| Site name | Site | Longitude | Latitude | Style      | Meteorological sites |
|-----------|------|-----------|----------|------------|----------------------|
| Chengdong | CD   | 117°53'E  | 36°31'N  | Downwind   | Boshan               |
| Chengqu   | CQ   | 118°60'E  | 36°57'N  | Upwind     | Huantai              |
| Tianzhen  | TZ   | 117°48'E  | 37°10'N  | Suburban   | Gaoqing              |
| Xindian   | XD   | 118°19'E  | 36°48'N  | Industrial | Linzi                |
| Zhonglou  | ZL   | 117°54'E  | 36°39'N  | Urban      | Zichuan              |

**Table S2 Comparison of VOC concentrations and compositions in this study with former studies.**

| City     | Site     | Type       | Period                                       | Species | TVOCs | Alkanes | Alkenes | Aromatics | Acetylene | OVOCs | Halocarbons       | References           |
|----------|----------|------------|----------------------------------------------|---------|-------|---------|---------|-----------|-----------|-------|-------------------|----------------------|
| Zibo     | CD       | Downwind   | August 8-13, 2021                            | 74      | 35.3  | 13.4    | 3.4     | 4.1       | 4.0       | 10.4  |                   | This study           |
|          | CQ       | Upwind     |                                              |         | 42.6  | 16.9    | 3.9     | 7.5       | 0.5       | 13.9  |                   |                      |
|          | TZ       | Suburban   |                                              |         | 55.1  | 29.4    | 3.8     | 2.1       | 0.0       | 19.7  |                   |                      |
|          | XD       | Industrial |                                              |         | 47.0  | 22.3    | 3.4     | 2.9       | 1.6       | 16.8  |                   |                      |
|          | ZL       | Urban      |                                              |         | 41.3  | 14.3    | 5.8     | 6.2       | 0.0       | 14.9  |                   |                      |
|          | TZ       | Suburban   | High-O <sub>3</sub> episodes in<br>July 2019 | 56      | 58.1  | 43.8    | 3.7     | 5.5       | 3.1       |       | (Li et al., 2021) |                      |
|          | BJ       | Urban      |                                              |         | 23.8  | 13.8    | 3.2     | 3.7       | 2.4       |       |                   |                      |
| XD       | Suburban | 38.1       |                                              |         | 22.5  | 7.8     | 3.4     | 3.2       |           |       |                   |                      |
| Qingdao  | Rural    |            | October 5 to<br>November 10, 2018            | 106     | 7.6   | 4.7     | 1.6     | 0.6       | 0.2       | 0.4   |                   | (Liu et al., 2021a)  |
| Rizhao   | Urban    |            | December 2021 to<br>October 2022             | 111     | 19.7  | 8.6     | 2.1     | 1.4       | 0.7       | 4.0   | 3.6               | (Zhang et al., 2023) |
| Jinan    | Downtown |            | June 2010 to May<br>2012                     | 55      | 25.3  | 14.3    | 7.0     | 4.0       |           |       |                   | (Wang et al., 2016)  |
| Shanxi   | LL       | Urban      | 2019-2020                                    | 115     | 44.4  | 19.4    | 5.3     | 4.5       | 1.8       | 10.8  | 2.7               | (Liu et al., 2023)   |
|          | LF       |            |                                              |         | 45.7  | 14.3    | 9.1     | 3.2       | 2.9       | 13.2  | 2.6               |                      |
|          | YC       |            |                                              |         | 37.5  | 13.9    | 5.9     | 2.4       | 3.1       | 9.6   | 2.7               |                      |
| Beijing  | Urban    |            | 2018                                         | 99      | 29.1  | 12.4    | 2.9     | 2.1       | 2.1       | 6.4   | 3.0               | (Li et al., 2022)    |
| Tianjing | Suburban |            | November 1, 2018 to<br>March 15, 2019        | 54      | 30.6  | 17.3    | 6.5     | 3.9       | 2.9       |       |                   | (Gu et al., 2020)    |
| Xianghe  | Suburban |            | August 7-25, 2018                            | 65      | 28.1  | 13.5    | 3.1     | 6.0       |           | 5.5   |                   | (Yang et al., 2021)  |
|          |          |            | December 1, 2018 to<br>January 5, 2019       |         | 58.0  | 28.6    | 9.8     | 8.3       |           | 11.3  |                   |                      |



| City      | Site     | Type       | Period                                   | Species | TVOCs | Alkanes | Alkenes | Aromatics | Acetylene | OVOCs | Halocarbons | References              |
|-----------|----------|------------|------------------------------------------|---------|-------|---------|---------|-----------|-----------|-------|-------------|-------------------------|
| Wangdu    | WD       | Rural      | 2014 and 2016(June–<br>July)             | 17      | 52.4  |         |         |           |           | 46.9  |             | (Han et al., 2019)      |
| Shenzhen  | YMK      | Rural      |                                          |         | 11.1  |         |         |           |           |       | 8.2         |                         |
| Heshan    |          | Suburban   | October 20 to<br>November 22, 2014       | 56      | 46.6  | 19.7    | 5.6     | 9.1       |           | 12.3  |             | (Yang et al., 2017)     |
| Beijing   |          | Urban      | August 10-27, 2013                       |         | 50.4  | 23.8    | 5.6     | 9.1       |           | 11.9  |             |                         |
| Zhengzhou |          | Urban      | May 3-24, 2018                           | 103     | 29.1  | 9.0     | 3.1     | 1.6       |           | 9.1   | 6.0         | (Li et al., 2020)       |
| Zhengzhou |          | Urban      | July 2019                                | 106     | 38.6  | 15.9    | 2.0     | 4.5       | 2.2       | 6.2   | 7.1         | (Wang et al., 2022)     |
| Xi'an     |          | Whole city | June 20 to July 20,<br>2019              | 99      | 29.1  | 10.4    | 3.0     | 1.8       | 1.3       | 9.3   | 3.2         | (Song et al., 2021)     |
| Shanghai  |          | Urban      | 2017.12.5-2018.1.15                      | 113     | 63.6  | 26.2    | 6.8     | 7.3       | 3.2       | 14.9  | 5.1         | (Liu et al., 2021b)     |
|           |          |            | March-May, 2019                          |         | 25.0  | 15.0    | 3.0     | 1.6       | 2.0       | 1.7   | 1.7         |                         |
|           |          |            | June-August, 2019                        |         | 20.0  | 9.5     | 2.6     | 1.5       | 1.4       | 3.0   | 1.9         |                         |
| Ningde    |          | Urban      | September-November,<br>2019              | 94      | 22.4  | 12.2    | 2.3     | 1.9       | 1.4       | 2.1   | 2.5         | (Chen et al., 2024)     |
|           |          |            | January-February,<br>2019                |         | 36.5  | 22.3    | 4.1     | 2.5       | 3.1       | 2.3   | 2.1         |                         |
| Fujian    | Mt. Wuyi | Background | August-October 2016                      | 70      | 6.1   | 1.9     | 1.1     | 1.3       |           |       | 1.8         | (Hong et al., 2019)     |
|           | XM       | Urban      |                                          | 70      | 17.9  | 9.1     | 2.1     | 4.1       |           |       | 2.6         |                         |
|           | FZ       | Urban      |                                          | 70      | 14.1  | 6.8     | 1.7     | 3.1       |           |       | 2.5         |                         |
| Shenzhen  | SZ-U     | Urban      | December 2017                            | 18      | 35.7  |         |         | 8.6       |           | 26.2  |             | (Huang et al.,<br>2019) |
|           | NA-R     | Regional   | December 20, 2015 to<br>January 15, 2016 |         | 13.5  |         |         | 4.1       |           | 8.7   |             |                         |
|           | NL-B     | Background | October 31, 2016 to<br>November 14, 2016 |         | 8.2   |         |         | 0.9       |           | 6.5   |             |                         |

| City      | Site | Type       | Period                             | Species | TVOCs | Alkanes | Alkenes | Aromatics | Acetylene | OVOCs | Halocarbons | References               |
|-----------|------|------------|------------------------------------|---------|-------|---------|---------|-----------|-----------|-------|-------------|--------------------------|
| Chongqing | JYS  | Urban      | August-September<br>2015           | 96      | 23.0  | 6.1     | 1.4     | 16.1      | 1.8       | 6.8   | 4.9         | (Li et al., 2018)        |
|           | CJZ  | Urban      |                                    | 96      | 49.9  | 17.7    | 7.1     | 5.8       | 5.2       | 7.6   | 4.8         |                          |
|           | NQ   | Urban      |                                    | 96      | 34.1  | 12.9    | 4.1     | 4.6       | 3.8       | 5.1   | 3.1         |                          |
| Chengdu   |      | Urban      | October 2016 to<br>September 2017  | 55      | 41.8  | 23.6    | 8.2     | 7.2       | 2.7       |       |             | (Song et al., 2018)      |
| Chengdu   |      | Whole city | May 2016 to January<br>2017        | 99      | 57.5  | 22.4    | 5.8     | 5.9       | 4.3       | 12.6  | 6.0         | (Simayi et al.,<br>2020) |
| Wuhan     |      | Urban      | Jan-21                             | 106     | 37.4  | 13.8    | 5.4     | 4.0       | 4.2       | 5.3   | 4.8         | (Xu et al., 2023)        |
| Wuhan     |      | Urban      | September 2016 to<br>August 2017   | 102     | 34.7  | 15.9    | 4.2     | 3.2       | 2.4       | 4.9   | 3.7         | (Hui et al., 2018)       |
| Shenyang  |      | Urban      | August 20 to<br>September 16, 2017 | 58      | 40.4  | 28.5    | 6.3     | 5.6       |           | 9.8   |             | (Ma et al., 2019)        |

**Table S3 Summary of main meteorological parameters and average levels of pollutants during the observation period.**

| Parameter                                | CD          | CQ           | TZ          | XD            | ZL          |
|------------------------------------------|-------------|--------------|-------------|---------------|-------------|
| WS (m s <sup>-1</sup> )                  | 2.1±1.2     | 2.0±1.0      | 1.9±1.0     | 1.9±1.1       | 1.5±1.0     |
| T (°C)                                   | 27.3±2.9    | 28.2±2.9     | 27.1±3.1    | 27.4±3.3      | 27.3±3.4    |
| RH (%)                                   | 69.1±11.8   | 70.4±13.1    | 85.4±17     | 74.6±13.9     | 70.9±14.9   |
| P (hPa)                                  | 984.6±2.5   | 1005.2±2.6   | 1005.6±2.6  | 1001.6±2.6    | 996.1±2.5   |
| BLH (m)                                  | 421.2±512.2 | 451.5±510.1  | 421.3±465.1 | 463.9±541.2   | 443.8±528.3 |
| SSR (10 <sup>5</sup> J m <sup>-2</sup> ) | 6.7±8.3     | 6.5±8.1      | 6.3±7.7     | 6.6±8.2       | 6.6±8.2     |
| NO (ppb)                                 | 3.9±4.7     | 4.5±7.8      | 1.9±4.1     | 1.1±1.1       | 2.6±2.9     |
| NO <sub>2</sub> (ppb)                    | 10.8±5.1    | 12.7±8.1     | 10.4±6.7    | 11.4±6.7      | 14.8±6.6    |
| SO <sub>2</sub> (ppb)                    | 3.4±1.3     | 3.0±0.5      | 2.2±1.6     | 1.4±1.3       | 3.9±1.5     |
| CO (ppb)                                 | 508±173.6   | 1176.4±578.4 | 674.3±190.9 | 1261.4±1174.1 | 868±258.3   |
| O <sub>3</sub> (ppb)                     | 58.6±30.0   | 56.4±34.2    | 51.0±27.8   | 56.1±29.4     | 57.4±32.2   |
| TVOCs (ppb)                              | 35.7±12.5   | 42.3±15.4    | 58.5±35.0   | 49.6±19.0     | 40.6±10.3   |
| Alkanes (ppb)                            | 13.2±6.2    | 16.5±8.5     | 30.2±21     | 23.3±11.2     | 13.5±5.6    |
| Alkenes (ppb)                            | 3.3±1.8     | 3.3±1.6      | 2.9±1.7     | 2.8±1.3       | 5.6±3.0     |
| Aromatics (ppb)                          | 4.0±1.7     | 7±3.6        | 2.2±1.2     | 3.1±1.5       | 6.3±4.7     |
| OVOCs (ppb)                              | 10.7±5      | 14.5±6.7     | 22.1±22.5   | 17.9±8.5      | 14.6±4.8    |
| Isoprene (ppb)                           | 0.2±0.2     | 0.6±0.6      | 1.1±0.8     | 0.7±0.5       | 0.6±0.7     |
| Alkyne (ppb)                             | 4.4±4.1     | 0.4±0.7      | 0±0         | 1.9±1.6       | 0±0         |

111 **Table S4 Modeled O<sub>3</sub> assessment of Base and Free scenario.**

| Site | Base |      | Free |      |
|------|------|------|------|------|
|      | IOA  | R    | IOA  | R    |
| CD   | 0.80 | 0.88 | 0.90 | 0.88 |
| CQ   | 0.90 | 0.87 | 0.86 | 0.87 |
| TZ   | 0.88 | 0.88 | 0.85 | 0.88 |
| XD   | 0.86 | 0.88 | 0.83 | 0.89 |
| ZL   | 0.88 | 0.89 | 0.88 | 0.87 |

112 **Table S5 Comparison concentrations of the Base and Free scenario modeling parameters,**  
 113 **including OVOCs, O<sub>3</sub>, RO<sub>2</sub>, HO<sub>2</sub>, and OH) at the five sites.**

| Parameter                | site | Conc  |        | Parameter               | site | Conc     |          |
|--------------------------|------|-------|--------|-------------------------|------|----------|----------|
|                          |      | Base  | Free   |                         |      | Base     | Free     |
| OVOCs                    | CD   | 10.32 | 18.72  | Daytime OH              | CD   | 3.87E+06 | 3.06E+06 |
|                          | CQ   | 13.98 | 26.33  |                         | CQ   | 2.78E+06 | 2.64E+06 |
|                          | TZ   | 21.93 | 21.9   |                         | TZ   | 2.99E+06 | 2.94E+06 |
|                          | XD   | 17.35 | 24.65  |                         | XD   | 3.10E+06 | 3.01E+06 |
|                          | ZL   | 14.17 | 32.09  |                         | ZL   | 3.56E+06 | 3.20E+06 |
| Daytime O <sub>3</sub>   | CD   | 60.89 | 68.17  | Daytime HO <sub>2</sub> | CD   | 4.13E+08 | 4.67E+08 |
|                          | CQ   | 82.43 | 84.11  |                         | CQ   | 7.75E+08 | 8.58E+08 |
|                          | TZ   | 66.18 | 68.76  |                         | TZ   | 7.56E+08 | 7.96E+08 |
|                          | XD   | 85.16 | 86.71  |                         | XD   | 6.45E+08 | 7.34E+08 |
|                          | ZL   | 96.77 | 106.26 |                         | ZL   | 7.26E+08 | 8.74E+08 |
| Daytime  ΔO <sub>3</sub> | CD   | 18.13 | 14.64  | Daytime RO <sub>2</sub> | CD   | 3.67E+08 | 4.96E+08 |
|                          | CQ   | 18.03 | 18.13  |                         | CQ   | 8.25E+08 | 8.79E+08 |
|                          | TZ   | 12.31 | 13.08  |                         | TZ   | 6.74E+08 | 7.29E+08 |
|                          | XD   | 18.63 | 19.83  |                         | XD   | 6.79E+08 | 7.26E+08 |
|                          | ZL   | 21.02 | 29.06  |                         | ZL   | 7.26E+08 | 8.72E+08 |

Note: Concentrations of OVOCs and O<sub>3</sub> in ppb, RO<sub>2</sub>, HO<sub>2</sub> and OH in molecules cm<sup>-3</sup>; |ΔO<sub>3</sub>| = |Sim – Obs|.

114

115 **Reference**

- 116 Chen, G., Liu, T., Chen, J., Xu, L., Hu, B., Yang, C., Fan, X., Li, M., Hong, Y., Ji, X., Chen, J., and  
117 Zhang, F.: Atmospheric oxidation capacity and O<sub>3</sub> formation in a coastal city of southeast China:  
118 Results from simulation based on four-season observation, *J. Environ. Sci.*, 136, 68–80,  
119 <https://doi.org/10.1016/j.jes.2022.11.015>, 2024.
- 120 Del Negro, L. A., Fahey, D. W., Gao, R. S., Donnelly, S. G., Keim, E. R., Neuman, J. A., Cohen,  
121 R. C., Perkins, K. K., Koch, L. C., Salawitch, R. J., Lloyd, S. A., Proffitt, M. H., Margitan, J. J.,  
122 Stimpfle, R. M., Bonne, G. P., Voss, P. B., Wennberg, P. O., McElroy, C. T., Swartz, W. H.,  
123 Kusterer, T. L., Anderson, D. E., Lait, L. R., and Bui, T. P.: Comparison of modeled and observed  
124 values of NO<sub>2</sub> and JNO<sub>2</sub> during the Photochemistry of Ozone Loss in the Arctic Region in Summer  
125 (POLARIS) mission, *J. Geophys. Res.-Atmos.*, 104, 26687–26703,  
126 <https://doi.org/10.1029/1999JD900246>, 1999.
- 127 Gu, Y., Liu, B., Li, Y., Zhang, Y., Bi, X., Wu, J., Song, C., Dai, Q., Han, Y., Ren, G., and Feng, Y.:  
128 Multi-scale volatile organic compound (VOC) source apportionment in Tianjin, China, using a  
129 receptor model coupled with 1-hr resolution data, *Environ. Pollut.*, 265, 115023,  
130 <https://doi.org/10.1016/j.envpol.2020.115023>, 2020.
- 131 Han, Y., Huang, X., Wang, C., Zhu, B., and He, L.: Characterizing oxygenated volatile organic  
132 compounds and their sources in rural atmospheres in China, *J. Environ. Sci.*, 81, 148–155,  
133 <https://doi.org/10.1016/j.jes.2019.01.017>, 2019.
- 134 Hong, Z., Li, M., Wang, H., Xu, L., Hong, Y., Chen, J., Chen, J., Zhang, H., Zhang, Y., Wu, X., Hu,  
135 B., and Li, M.: Characteristics of atmospheric volatile organic compounds (VOCs) at a mountainous  
136 forest site and two urban sites in the southeast of China, *Sci. Total Environ.*, 657, 1491–1500,  
137 <https://doi.org/10.1016/j.scitotenv.2018.12.132>, 2019.
- 138 Huang, X.-F., Wang, C., Zhu, B., Lin, L.-L., and He, L.-Y.: Exploration of sources of OVOCs in  
139 various atmospheres in southern China, *Environ. Pollut.*, 249, 831–842,  
140 <https://doi.org/10.1016/j.envpol.2019.03.106>, 2019.
- 141 Hui, L., Liu, X., Tan, Q., Feng, M., An, J., Qu, Y., Zhang, Y., and Jiang, M.: Characteristics, source  
142 apportionment and contribution of VOCs to ozone formation in Wuhan, Central China, *Atmos.*  
143 *Environ.*, 192, 55–71, <https://doi.org/10.1016/j.atmosenv.2018.08.042>, 2018.
- 144 Kim, S., Kim, S.-Y., Lee, M., Shim, H., Wolfe, G. M., Guenther, A. B., He, A., Hong, Y., and Han,  
145 J.: Impact of isoprene and HONO chemistry on ozone and OVOC formation in a semirural South  
146 Korean forest, *Atmos. Chem. Phys.*, 15, 4357–4371, <https://doi.org/10.5194/acp-15-4357-2015>,  
147 2015.
- 148 Li, C., Liu, Y., Cheng, B., Zhang, Y., Liu, X., Qu, Y., An, J., Kong, L., Zhang, Y., Zhang, C., Tan,  
149 Q., and Feng, M.: A comprehensive investigation on volatile organic compounds (VOCs) in 2018  
150 in Beijing, China: Characteristics, sources and behaviours in response to O<sub>3</sub> formation, *Sci. Total*  
151 *Environ.*, 806, 150247, <https://doi.org/10.1016/j.scitotenv.2021.150247>, 2022.
- 152 Li, J., Zhai, C., Yu, J., Liu, R., Li, Y., Zeng, L., and Xie, S.: Spatiotemporal variations of ambient  
153 volatile organic compounds and their sources in Chongqing, a mountainous megacity in China, *Sci.*  
154 *Total Environ.*, 627, 1442–1452, <https://doi.org/10.1016/j.scitotenv.2018.02.010>, 2018.
- 155 Li, K., Wang, X., Li, L., Wang, J., Liu, Y., Cheng, X., Xu, B., Wang, X., Yan, P., Li, S., Geng, C.,  
156 Yang, W., Azzi, M., and Bai, Z.: Large variability of O<sub>3</sub>-precursor relationship during severe ozone  
157 polluted period in an industry-driven cluster city (Zibo) of North China Plain, *J. Clean Prod.*, 316,  
158 128252, <https://doi.org/10.1016/j.jclepro.2021.128252>, 2021.
- 159 Li, X., Rohrer, F., Brauers, T., Hofzumahaus, A., Lu, K., Shao, M., Zhang, Y. H., and Wahner, A.:  
160 Modeling of HCHO and CHOCHO at a semi-rural site in southern China during the PRIDE-

161 PRD2006 campaign, *Atmos. Chem. Phys.*, 14, 12291–12305, [https://doi.org/10.5194/acp-14-](https://doi.org/10.5194/acp-14-12291-2014)  
162 12291-2014, 2014.

163 Li, Y., Yin, S., Yu, S., Yuan, M., Dong, Z., Zhang, D., Yang, L., and Zhang, R.: Characteristics,  
164 source apportionment and health risks of ambient VOCs during high ozone period at an urban site  
165 in central plain, China, *Chemosphere*, 250, 126283,  
166 <https://doi.org/10.1016/j.chemosphere.2020.126283>, 2020.

167 Liu, Y., Shen, H., Mu, J., Li, H., Chen, T., Yang, J., Jiang, Y., Zhu, Y., Meng, H., Dong, C., Wang,  
168 W., and Xue, L.: Formation of peroxyacetyl nitrate (PAN) and its impact on ozone production in  
169 the coastal atmosphere of Qingdao, North China, *Sci. Total Environ.*, 778, 146265,  
170 <https://doi.org/10.1016/j.scitotenv.2021.146265>, 2021a.

171 Liu, Y., Wang, H., Jing, S., Peng, Y., Gao, Y., Yan, R., Wang, Q., Lou, S., Cheng, T., and Huang,  
172 C.: Strong regional transport of volatile organic compounds (VOCs) during wintertime in Shanghai  
173 megacity of China, *Atmos. Environ.*, 244, 117940, <https://doi.org/10.1016/j.atmosenv.2020.117940>,  
174 2021b.

175 Liu, Y., Qiu, P., Xu, K., Li, C., Yin, S., Zhang, Y., Ding, Y., Zhang, C., Wang, Z., Zhai, R., Deng,  
176 Y., Yan, F., Zhang, W., Xue, Z., Sun, Y., Ji, D., Li, J., Chen, J., Tian, H., Liu, X., and Zhang, Y.:  
177 Analysis of VOC emissions and O<sub>3</sub> control strategies in the Fenhe Plain cities, China, *J. Environ.*  
178 *Manage*, 325, 116534, <https://doi.org/10.1016/j.jenvman.2022.116534>, 2023.

179 Ma, Z., Liu, C., Zhang, C., Liu, P., Ye, C., Xue, C., Zhao, D., Sun, J., Du, Y., Chai, F., and Mu, Y.:  
180 The levels, sources and reactivity of volatile organic compounds in a typical urban area of Northeast  
181 China, *J. Environ. Sci.*, 79, 121–134, <https://doi.org/10.1016/j.jes.2018.11.015>, 2019.

182 Simayi, M., Shi, Y., Xi, Z., Li, J., Yu, X., Liu, H., Tan, Q., Song, D., Zeng, L., Lu, S., and Xie, S.:  
183 Understanding the sources and spatiotemporal characteristics of VOCs in the Chengdu Plain, China,  
184 through measurement and emission inventory, *Sci. Total Environ.*, 714, 136692,  
185 <https://doi.org/10.1016/j.scitotenv.2020.136692>, 2020.

186 Song, M., Tan, Q., Feng, M., Qu, Y., Liu, X., An, J., and Zhang, Y.: Source Apportionment and  
187 Secondary Transformation of Atmospheric Nonmethane Hydrocarbons in Chengdu, Southwest  
188 China, *J. Geophys. Res.-Atmos.*, 123, 9741–9763, <https://doi.org/10.1029/2018JD028479>, 2018.

189 Song, M., Li, X., Yang, S., Yu, X., Zhou, S., Yang, Y., Chen, S., Dong, H., Liao, K., Chen, Q., Lu,  
190 K., Zhang, N., Cao, J., Zeng, L., and Zhang, Y.: Spatiotemporal variation, sources, and secondary  
191 transformation potential of volatile organic compounds in Xi'an, China, *Atmos. Chem. Phys.*, 21,  
192 4939–4958, <https://doi.org/10.5194/acp-21-4939-2021>, 2021.

193 Tan, Z., Fuchs, H., Lu, K., Hofzumahaus, A., Bohn, B., Broch, S., Dong, H., Gomm, S., Haeseler,  
194 R., He, L., Holland, F., Li, X., Liu, Y., Lu, S., Rohrer, F., Shao, M., Wang, B., Wang, M., Wu, Y.,  
195 Zeng, L., Zhang, Y., Wahner, A., and Zhang, Y.: Radical chemistry at a rural site (Wangdu) in the  
196 North China Plain: observation and model calculations of OH, HO<sub>2</sub> and RO<sub>2</sub> radicals, *Atmos. Chem.*  
197 *Phys.*, 17, 663–690, <https://doi.org/10.5194/acp-17-663-2017>, 2017.

198 Tan, Z., Lu, K., Jiang, M., Su, R., Wang, H., Lou, S., Fu, Q., Zhai, C., Tan, Q., Yue, D., Chen, D.,  
199 Wang, Z., Xie, S., Zeng, L., and Zhang, Y.: Daytime atmospheric oxidation capacity in four Chinese  
200 megacities during the photochemically polluted season: a case study based on box model simulation,  
201 *Atmos. Chem. Phys.*, 19, 3493–3513, <https://doi.org/10.5194/acp-19-3493-2019>, 2019.

202 Wang, N., Li, N., Liu, Z., and Evans, E.: Investigation of chemical reactivity and active components  
203 of ambient VOCs in Jinan, China, *Air Qual Atmos Health*, 9, 785–793,  
204 <https://doi.org/10.1007/s11869-015-0380-1>, 2016.

- 205 Wang, X., Yin, S., Zhang, R., Yuan, M., and Ying, Q.: Assessment of summertime O<sub>3</sub> formation  
206 and the O<sub>3</sub>-NO<sub>x</sub>-VOC sensitivity in Zhengzhou, China using an observation-based model, *Sci. Total*  
207 *Environ.*, 813, 152449, <https://doi.org/10.1016/j.scitotenv.2021.152449>, 2022.
- 208 Xu, K., Liu, Y., Li, C., Zhang, C., Liu, X., Li, Q., Xiong, M., Zhang, Y., Yin, S., and Ding, Y.:  
209 Enhanced secondary organic aerosol formation during dust episodes by photochemical reactions in  
210 the winter in Wuhan, *J. Environ. Sci.*, 133, 70–82, [https://doi.org/10.1016/j.jes.2022.04.0181001-](https://doi.org/10.1016/j.jes.2022.04.0181001-0742)  
211 0742, 2023.
- 212 Xu, Z., Wang, T., Xue, L. K., Louie, P. K. K., Luk, C. W. Y., Gao, J., Wang, S. L., Chai, F. H., and  
213 Wang, W. X.: Evaluating the uncertainties of thermal catalytic conversion in measuring atmospheric  
214 nitrogen dioxide at four differently polluted sites in China, *Atmos. Environ.*, 76, 221–226,  
215 <https://doi.org/10.1016/j.atmosenv.2012.09.043>, 2013.
- 216 Yang, Y., Shao, M., Keβel, S., Li, Y., Lu, K., Lu, S., Williams, J., Zhang, Y., Zeng, L., Nölscher,  
217 A. C., Wu, Y., Wang, X., and Zheng, J.: How the OH reactivity affects the ozone production  
218 efficiency: case studies in Beijing and Heshan, China, *Atmos. Chem. Phys.*, 17, 7127–7142,  
219 <https://doi.org/10.5194/acp-17-7127-2017>, 2017.
- 220 Yang, Y., Wang, Y., Huang, W., Yao, D., Zhao, S., Wang, Y., Ji, D., Zhang, R., and Wang, Y.:  
221 Parameterized atmospheric oxidation capacity and speciated OH reactivity over a suburban site in  
222 the North China Plain: A comparative study between summer and winter, *Sci. Total Environ.*, 773,  
223 145264, <https://doi.org/10.1016/j.scitotenv.2021.145264>, 2021.
- 224 Zhang, Z., Sun, Y., and Li, J.: Characteristics and sources of VOCs in a coastal city in eastern China  
225 and the implications in secondary organic aerosol and O<sub>3</sub> formation, *Sci. Total Environ.*, 887,  
226 164117, <https://doi.org/10.1016/j.scitotenv.2023.164117>, 2023.
